# Supplementary material for: Label-free phenotyping of peripheral blood lymphocytes by infrared imaging
Source: Royal Society of Chemistry journal article supplement (doi:10.1039/c4an01855a), 2014-12-15
Supplement: c4an01855a1.pdf [file c4an01855a1.pdf]

## Supplementary Information

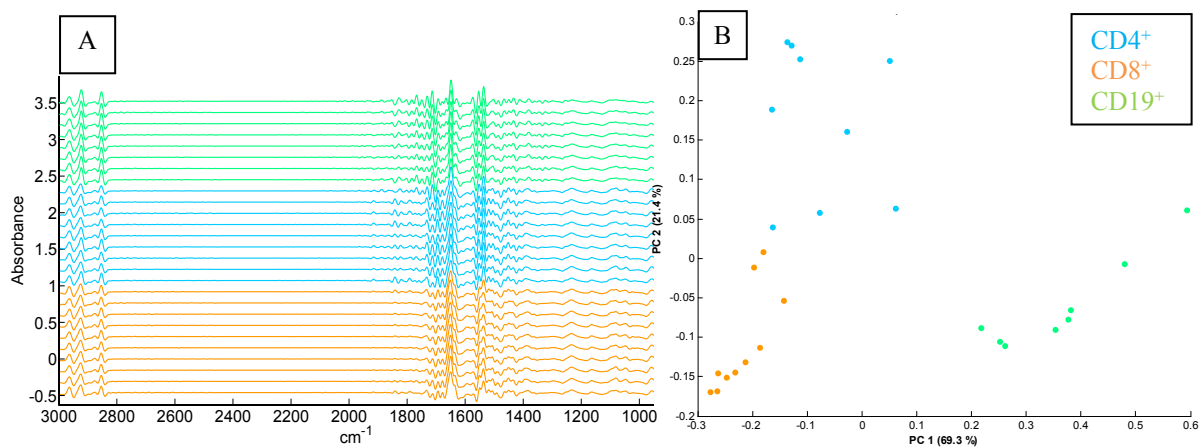

**Figure S1:** PCA performed on the second derivative IR spectra recorded on lymphocyte subpopulations of one healthy donor. **A.** 28 second derivative mean spectra from purified unlabelled CD4<sup>+</sup> T lymphocytes (blue), CD8<sup>+</sup>

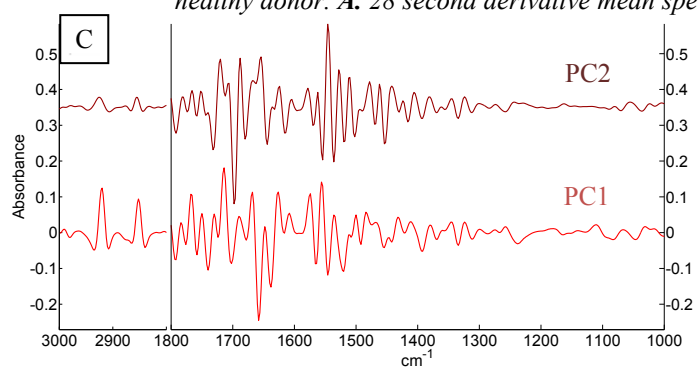

*T lymphocytes (orange) and CD19<sup>+</sup> B lymphocytes (green) isolated from the peripheral blood of Donor 1. Each spectrum is the mean of IR spectra obtained on one IR image. Spectra have been offset for visual clarity. **B.** Score plots showing the projection of each spectrum of Figure A in the PC1-PC2 space. The spectral range used for the analysis is the combined region 3000-2800 and 1800-1000 cm<sup>-1</sup>. **C.** Principal components PC1 and PC2.*
